# Supplementary material for: Dual effects of the Nrf2 inhibitor for inhibition of hepatitis C virus and hepatic cancer cells
Source: Springer Nature journal article supplement (doi:10.1186/s12885-018-4588-y), 2018-06-25

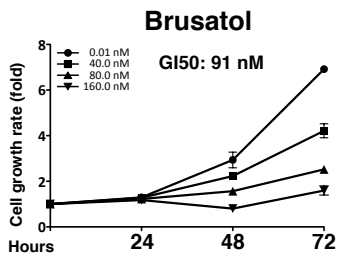

Supplement: MOESM2 [file 15878338]
